# Supplementary material for: N-3 polyunsaturated fatty acids effectively protect against neural tube defects in diabetic mice induced by streptozotocin
Source: Royal Society of Chemistry journal article supplement (doi:10.1039/d1fo01606g), 2021-01-01
Supplement: d1fo01606g1.pdf [file d1fo01606g1.pdf]

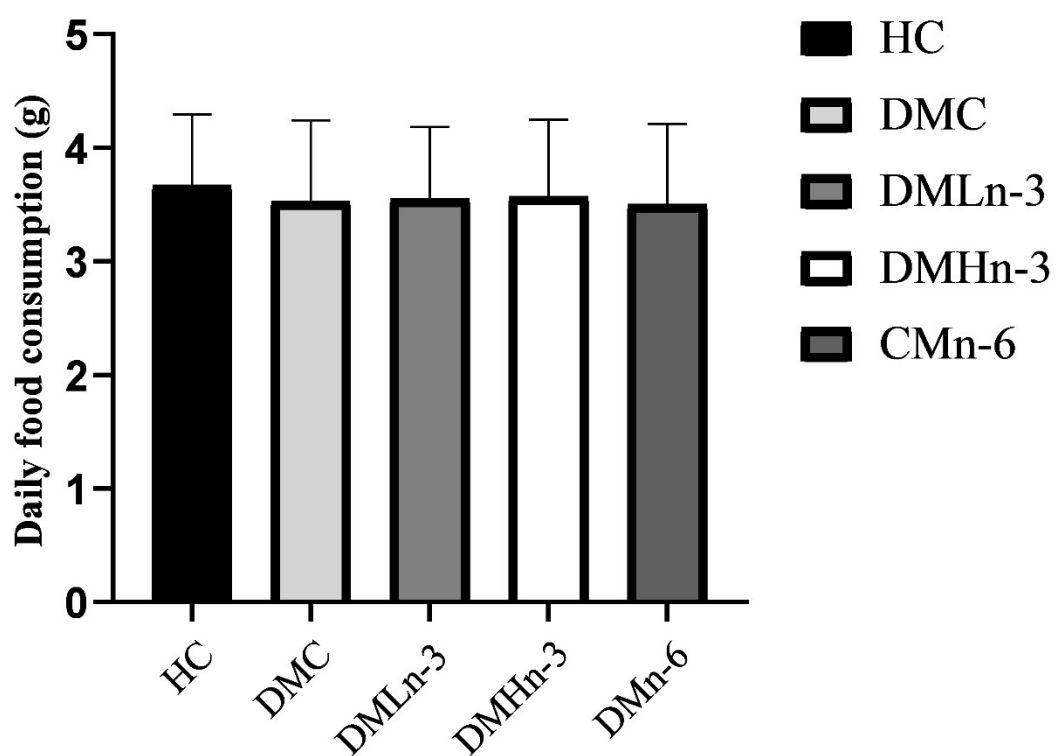

**Figure S1.** Average daily intake of fodders during pregnancy. Data were expressed as mean  $\pm$  SD. No significant group difference was observed.
